# Supplementary material for: A branch-leaf-like hierarchical self-supporting electrode as a highly efficient catalyst for hydrogen evolution
Source: Royal Society of Chemistry journal article supplement (doi:10.1039/d1nj00836f), 2021-01-01
Supplement: d1nj00836f1.pdf [file d1nj00836f1.pdf]

Supporting Information

**Branch-leaf-like Hierarchical Self Supporting Electrode as a  
Highly Efficient Catalyst for Hydrogen Evolution**

Yuekun Zhang,<sup>a</sup> Gang Yan,<sup>a,b,\*</sup> Yue Shi,<sup>a</sup> Huaqiao Tan<sup>a,\*</sup>, Yangguang Li<sup>a,\*</sup>

*a. Key Laboratory of Polyoxometalate Science of the Ministry of Education, Faculty of Chemistry, Northeast Normal University, Changchun, 130024, China*

*b. College of Material Science and Engineering, Jilin Jianzhu University, Changchun, 130118, China*

E-mail: liyg658@nenu.edu.cn; tanhq870@nenu.edu.cn; yang431@nenu.edu.cn

## 1. Experimental section

### 1.1. Materials and chemicals

Ni foam (NF, thickness: 0.3 mm) was purchased from Changsha Lyrun Material Co., Ltd. Ni foam first was cleaned with diluted HCl, acetone, and deionized water for three times to remove surface oil and oxide layers. Then the cleaned NF is cut into a rectangle of 4\*0.5 cm. Nickel(II) Chloride Hexahydrate  $\text{Ni}(\text{Cl})_2 \cdot 6\text{H}_2\text{O}$ , Cobaltous chloride hexahydrate  $\text{Co}(\text{Cl})_2 \cdot 6\text{H}_2\text{O}$ , Sodium Molybdate Dihydrate, methenamine  $\text{Na}_2\text{MoO}_4 \cdot 2\text{H}_2\text{O}$ , Nickel(II) nitrate hexahydrate  $\text{Ni}(\text{NO}_3)_2 \cdot 6\text{H}_2\text{O}$ , Ammonium molybdate tetrahydrate  $(\text{NH}_4)_6\text{Mo}_7\text{O}_{24} \cdot 4\text{H}_2\text{O}$ , Carbamide  $\text{CO}(\text{NH}_2)_2$ , Potassium hydroxide (KOH) were purchased from Shanghai Aladdin Bio-Chem Technology Co., LTD. Commercial 20% Pt/C was purchased from Shanghai Macklin Biochemical Co., Ltd. Highly purified water ( $> 18 \text{ M}\Omega \cdot \text{cm}$  resistivity) was provided by a PALL PURELAB Plus system. Commercial 20% Pt/C electrocatalyst deposited on nickel foam (weight density:  $1 \text{ mg}/\text{cm}^2$ ) using Nafion as a binder. The simulated seawater was prepared by mixing 26.73 g of NaCl, 2.26 g of  $\text{MgCl}_2$ , 3.25 g of  $\text{MgSO}_4$ , 1.12 g of  $\text{CaCl}_2$ , 0.19 g of  $\text{NaHCO}_3$ , 3.48 g of  $\text{Na}_2\text{SO}_4$  and 0.72 g of KCl in 1 L of ultrapure water.

### 1.2. Preparation of $\text{NiCo}_2\text{O}_4$ @NF composite

$\text{NiCo}_2\text{O}_4$  nanowires arrays were grown on Ni foam by simple hydrothermal method. Briefly,  $\text{NiCl}_2 \cdot 6\text{H}_2\text{O}$  (2.5 mmol), urea (15 mmol) and  $\text{CoCl}_2 \cdot 6\text{H}_2\text{O}$  (5 mmol) were dissolved in 80 mL distilled water. After stirring for 30 min, this solution was transferred to PTFE stainless steel autoclave. The cleaned Ni foam with size about 4\*0.5 cm was vertically placed in the autoclave.  $\text{NiCo}_2\text{O}_4$  nanoneedle arrays were obtained after heated the solution at  $150 \text{ }^\circ\text{C}$  for 12 h. After cooled down to room temperature, the as-prepared sample was cleaned with distilled water and further dried at  $80 \text{ }^\circ\text{C}$ . Subsequently, the sample was heated to  $300 \text{ }^\circ\text{C}$  at a heating rate of  $2 \text{ }^\circ\text{C min}^{-1}$  for 2 h under air atmosphere.

### 1.3. Synthesis of $\text{NiMoO}_4/\text{NiCo}_2\text{O}_4$ @NF

2 mmol  $\text{NiSO}_4$  and 2 mmol  $(\text{NH}_4)_6\text{Mo}_7\text{O}_{24} \cdot 4\text{H}_2\text{O}$  were dissolved in 80 mL distilled water. After stirring for 30 min, this solution was transferred to PTFE stainless steel autoclave.  $\text{NiCo}_2\text{O}_4$ @NF was vertically placed in the autoclave.  $\text{NiMoO}_4/\text{NiCo}_2\text{O}_4$ @NF was obtained after heated the solution at  $120 \text{ }^\circ\text{C}$  for 6 h. After cooled down to room temperature, the as-prepared sample was cleaned with distilled water and further dried at  $80 \text{ }^\circ\text{C}$ .

#### 1.4. Synthesis of MoNi<sub>4</sub>/MoO<sub>3-x</sub>/NiCo@NF

The obtained precursor NiMoO<sub>4</sub>/NiCo<sub>2</sub>O<sub>4</sub>@NF was placed at in the tube furnace. Subsequently, the sample was heated to 350 °C at a heating rate of 2 °C min<sup>-1</sup> for 2 h under a H<sub>2</sub>/N<sub>2</sub> (v/v, 5/95) atmosphere.

#### 1.5. Characterizations

Powder X-Ray diffraction (PXRD) data were acquired with a Rigaku D/max-II B X-ray diffractometer using Cu-Kα radiation ( $\lambda = 1.5418 \text{ \AA}$ ). X-ray photoelectron spectroscopy (XPS) was carried out using an ESCALABMKII spectrometer and the X-ray source was achromatic Al-Kα (1486.6 eV). The transmission electron microscope JEOL-2100F was used to acquire the electron transmission microscopy (TEM) and HRTEM images. Scanning electron microscopy (SEM) and energy dispersive X-ray spectroscopy (EDS) were performed with a JEOL JSM 4800F scanning electron microscope. The evolved gases during HER were detected by gas chromatograph (Shimadzu, GC-2014C with a thermal conductivity detector).

#### 1.6. Electrochemical measurements

CHI 760E electrochemical workstation (Shanghai Chenhua, China) was used to test the electrochemical performance of catalysts in a typical three-electrode system. The electrolyte was 1 M KOH (pH = 14). MoNi<sub>4</sub>/MoO<sub>3-x</sub>/NiCo@NF works directly as a working electrode. Carbon rod and silver chloride electrode as the counter electrode and the reference electrode, respectively. The working surface area of the electrode maintained 0.1 cm<sup>2</sup>, with the rest of the electrode sealed with a modified acrylate adhesive. The fabrication of Pt/C working electrode as follows: 5 mg powdered 20% Pt/C was dispersed into 50 μL of 0.5 % Nafion solution and a homogeneous ink was obtained. Then this Pt/C-Nafion solution (5 μL) was drop-casted on NF and the working electrode surface area (0.1 cm<sup>2</sup>) is the same as those of MoNi<sub>4</sub>/MoO<sub>3-x</sub>/NiCo@NF. The tested potentials vs. Ag/AgCl are converted to the reversible hydrogen electrode (RHE) based on  $E_{\text{vs. RHE}} = E_{\text{Ag/AgCl}} + 0.0592 \text{ pH} + 0.197 \text{ V}$  ( $E_{\text{Ag/AgCl}} = 0.197 \text{ V}$ ). The linear sweep voltammetry (LSV) curves were obtained at the scan rate of 0.1 mV s<sup>-1</sup>. The i-t curves were tested to study the stability of catalysts. Unless otherwise stated, all potentials refer to RHE and all test results have not been corrected by IR.

#### 1.7. Estimation of effective electrode surface area

The ECSA (electrochemical surface area) was evaluated with cyclic voltammograms (CV) measurement at non-faradaic overpotentials. The CV measurements were performed at various scan rates (5, 7, 9, 11, and 13 mV/s) in 0.15-0.25 V vs. RHE. A linear trend was observed by plotting the difference of current

density between the anodic and cathodic at 0.2 V vs. RHE against the scan rate. The double layer capacitance ( $C_{dl}$ ) is equal to half of the slope of the fitting line. The slope is proportional to the electrode surface area of catalysts. Therefore, the electrochemical surface areas of different samples can be compared based on their  $C_{dl}$  values.

### **1.8. Measurements of electrochemical impedance spectroscopy (EIS)**

The operated overpotential was 0.2 V vs. RHE. The electrochemical impedance spectroscopy (EIS) was conducted from at certain potential with frequency from 0.1 Hz to 100000 Hz. A sinusoidal voltage with an amplitude of 5 mV were applied to carry out the measurements.

### **1.9. Determination of Faradaic yield**

The faradaic efficiency of electrocatalyst toward HER was carried out. A gas chromatograph was combined with an electrochemical workstation to test the Faraday efficiency in situ during the hydrogen production process. The electrolytic cell was continuously saturated with  $N_2$  at a steady flow rate of 100.00 sccm and injected directly into the gas-sampling loop of a gas chromatograph to quantitatively analyze the amount of hydrogen produced.

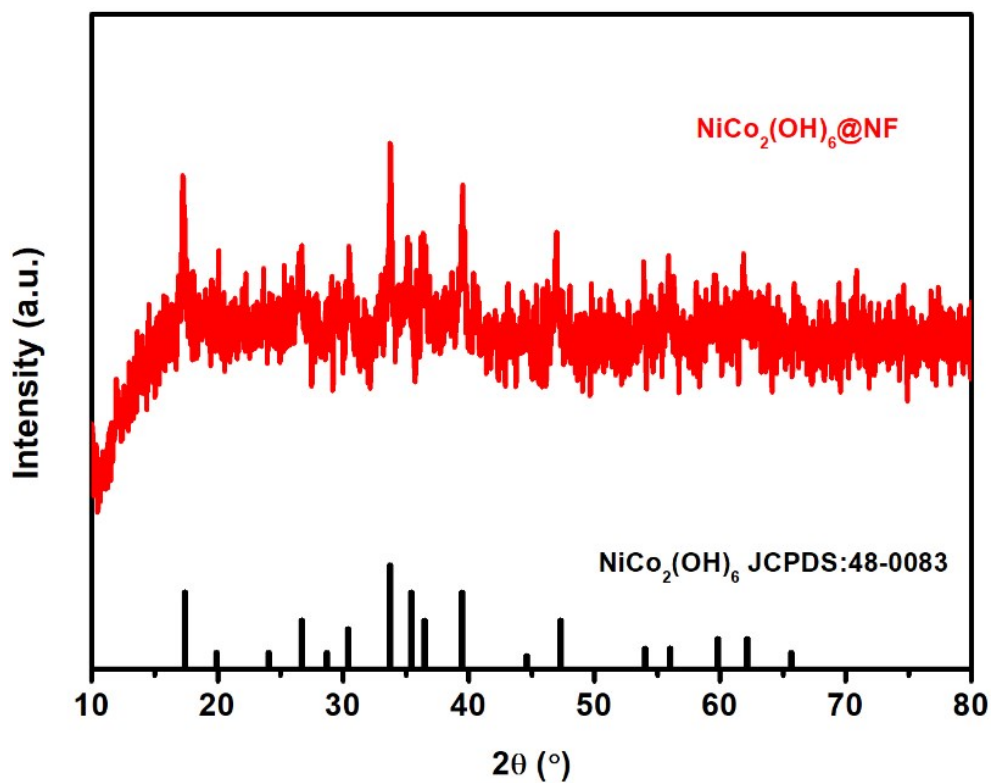

Fig. S1 XRD pattern of  $\text{NiCo}_2(\text{OH})_6@NF$

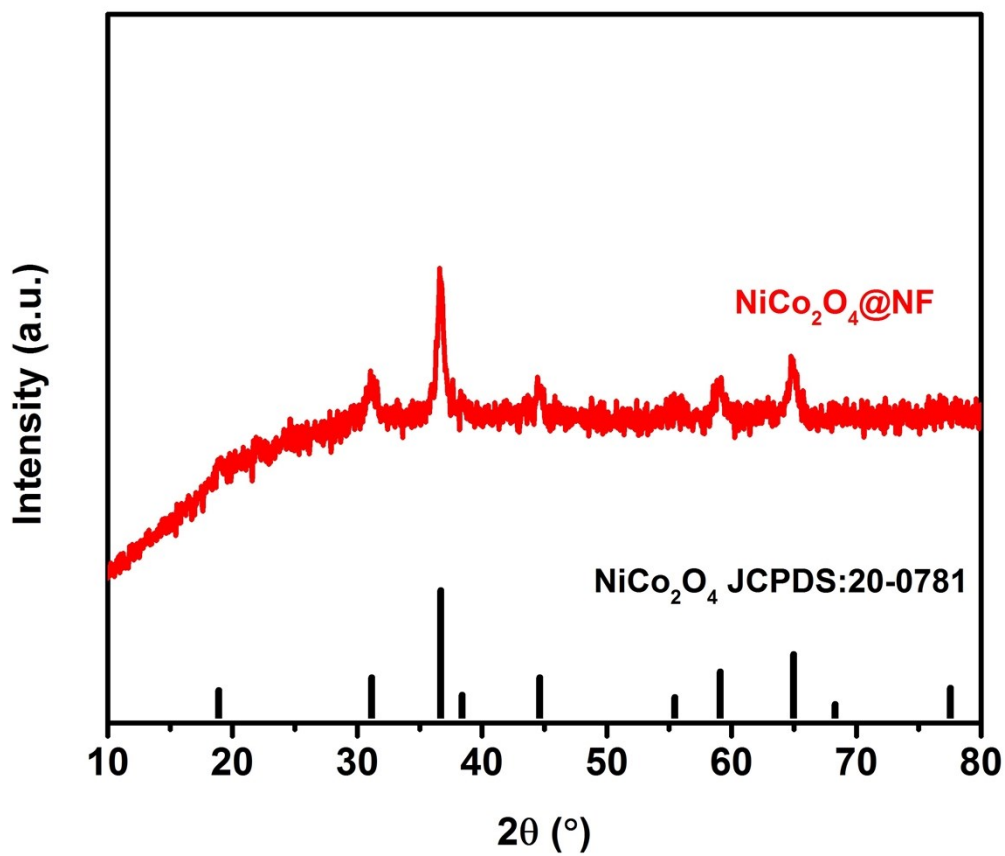

Fig. S2 XRD pattern of  $\text{NiCo}_2\text{O}_4@NF$

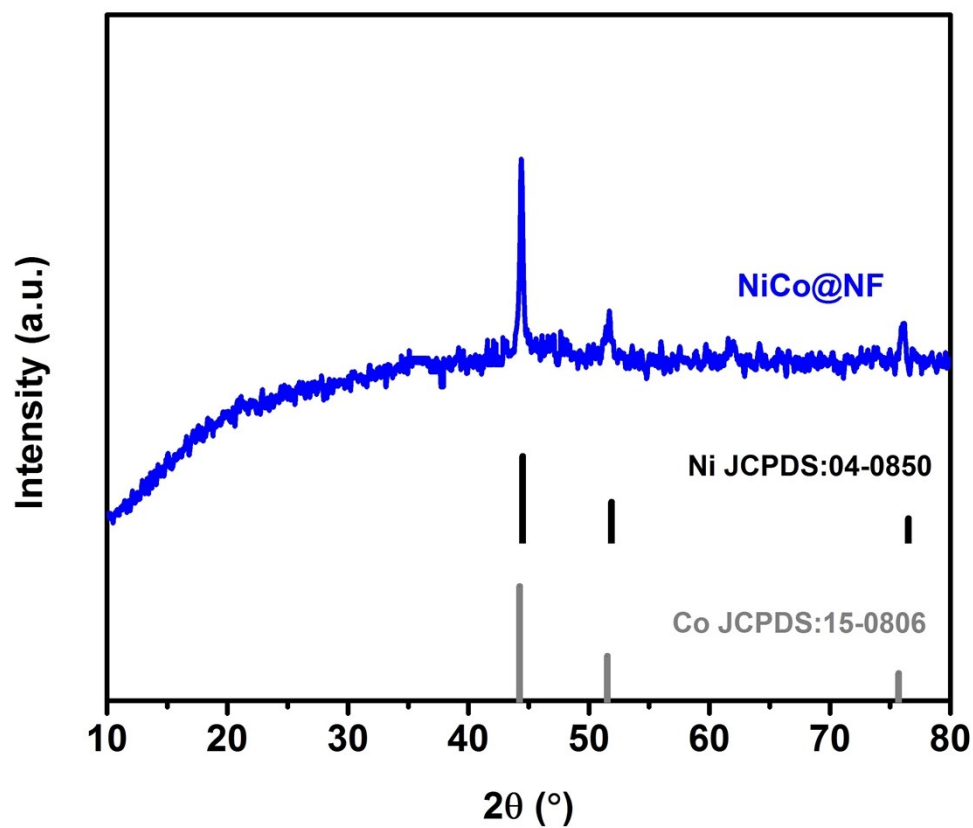

Fig. S3 XRD pattern of NiCo@NF

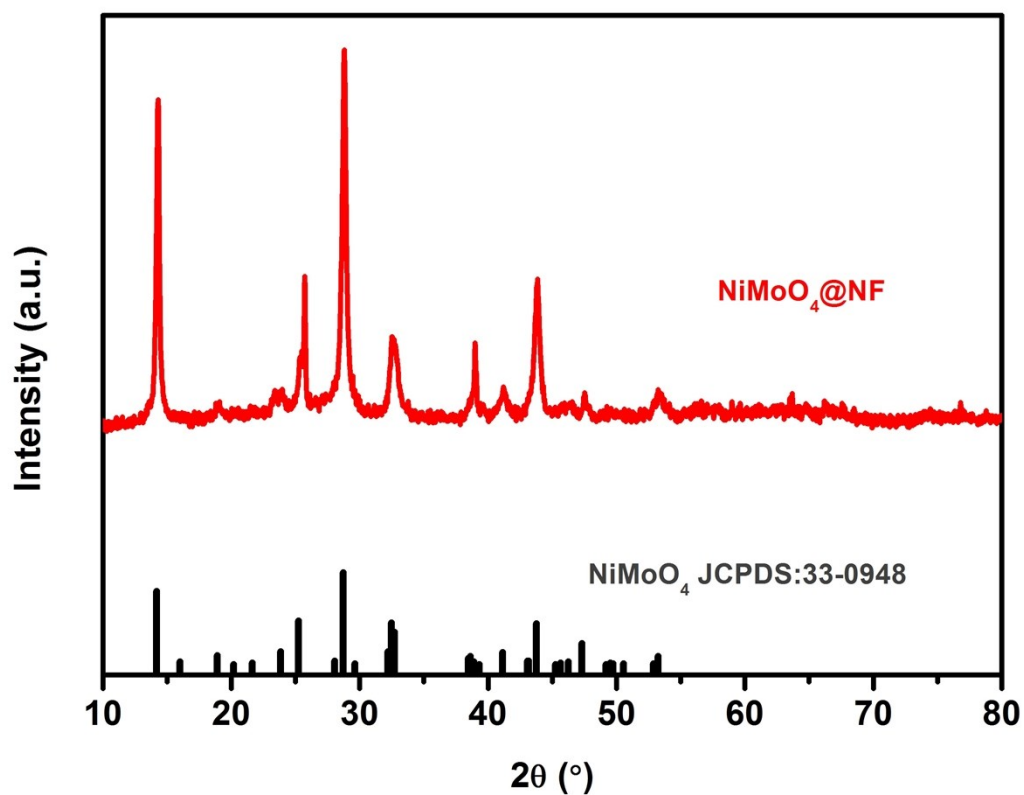

Fig. S4 XRD pattern of NiMoO<sub>4</sub>@NF

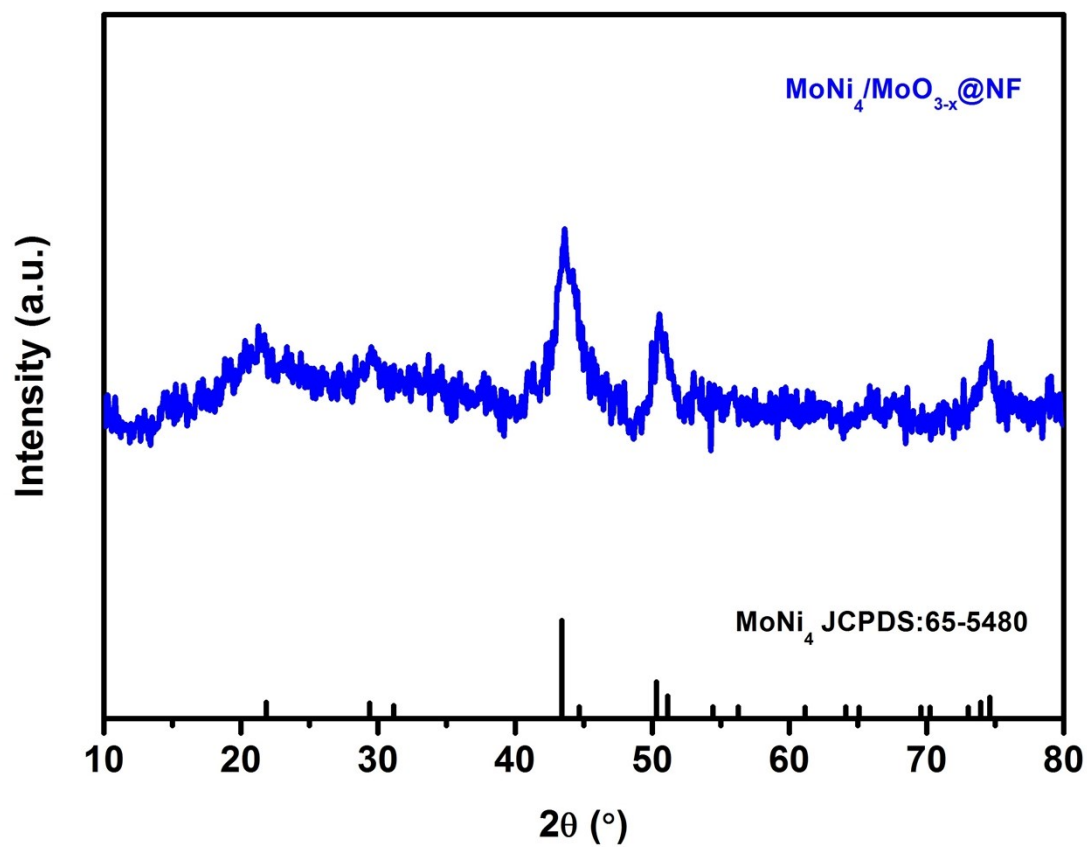

Fig. S5 XRD pattern of MoNi<sub>4</sub>/MoO<sub>3-x</sub>@NF

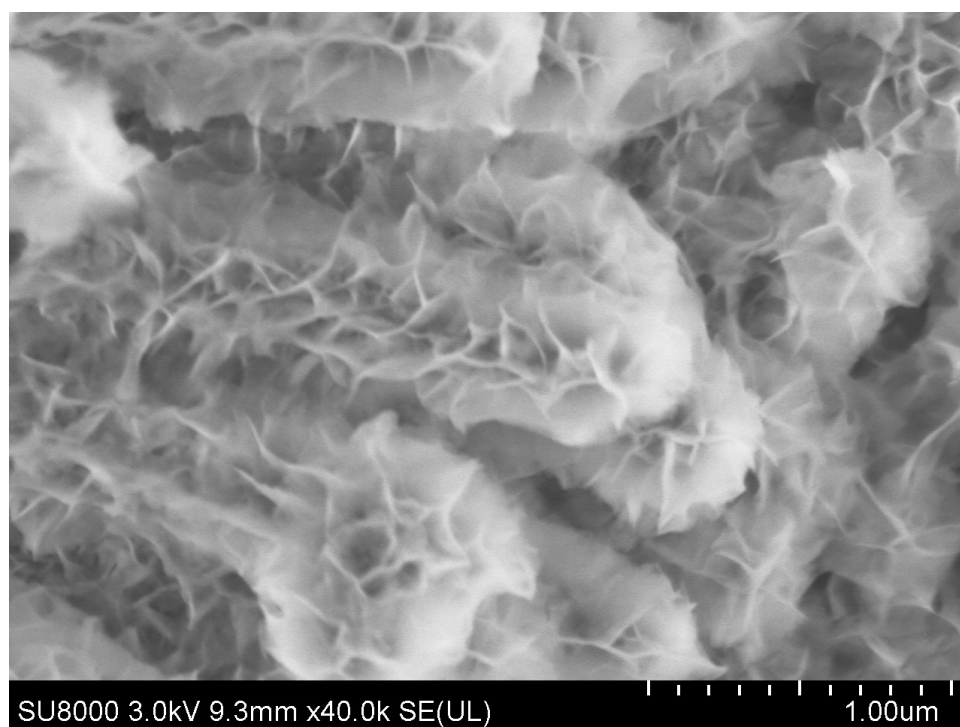

Fig. S6 SEM image of the NiMoO<sub>4</sub>/NiCo<sub>2</sub>O<sub>4</sub>@NF

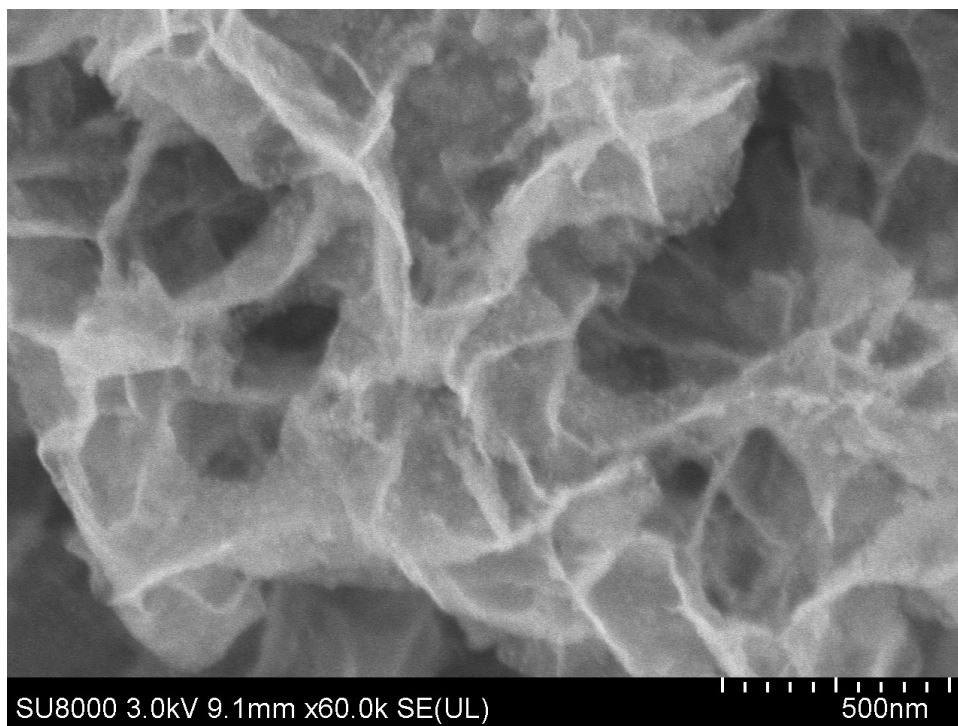

**Fig. S7** SEM images of the MoNi<sub>4</sub>/MoO<sub>3-x</sub>/NiCo@NF

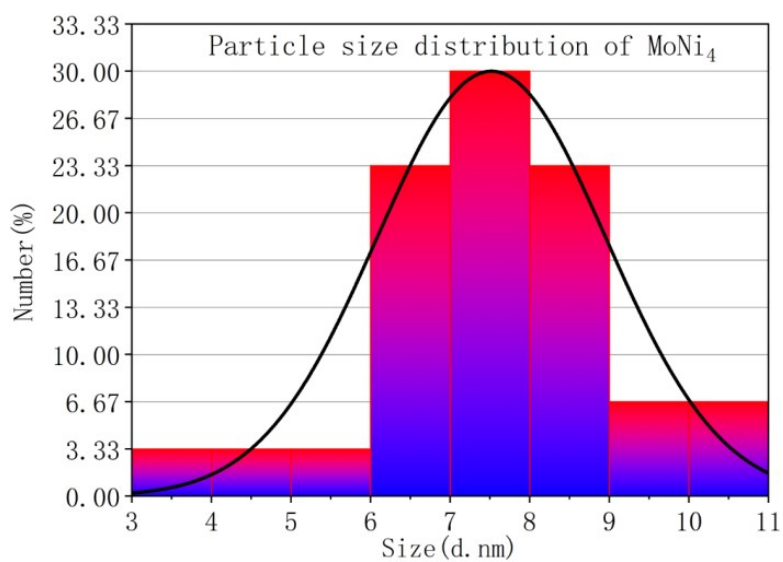

**Fig. S8** TEM image and particle size distribution map of the MoNi<sub>4</sub>/MoO<sub>3-x</sub>/NiCo@NF.



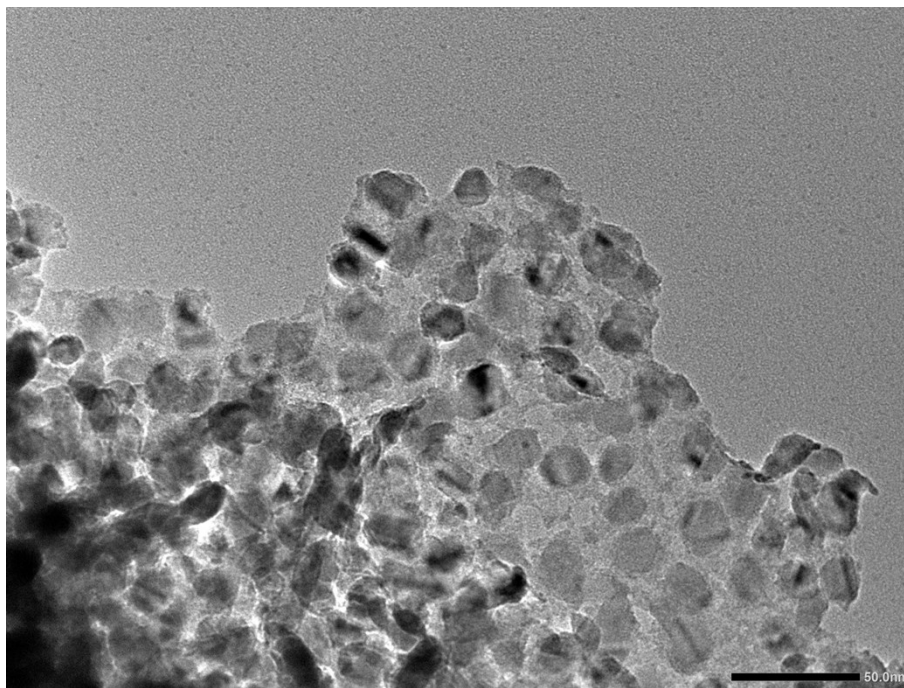

**Fig. S9** TEM image of  $\text{MoNi}_4/\text{MoO}_{3-x}/\text{NiCo@NF}$

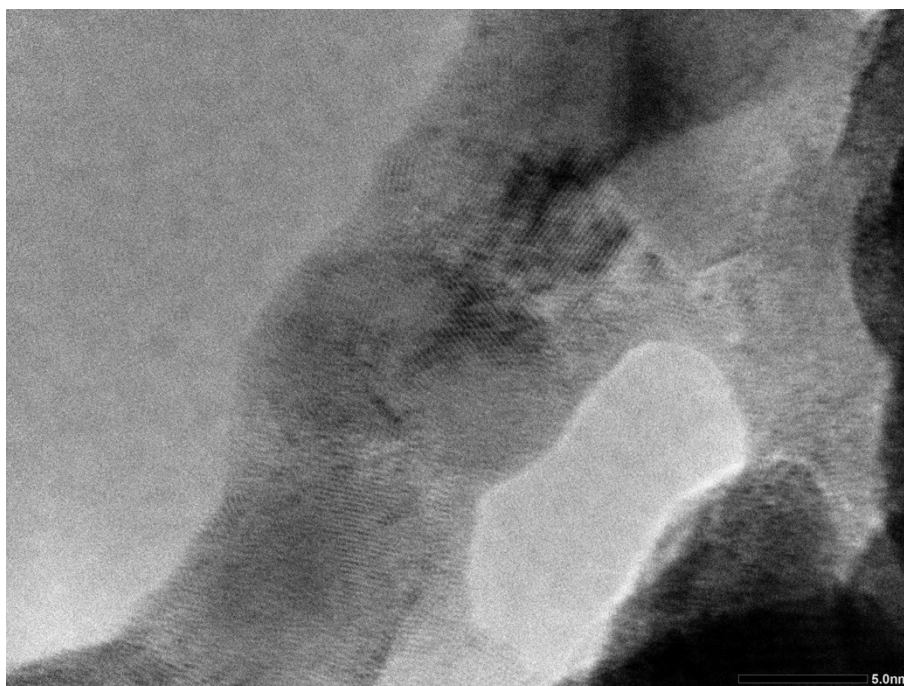

**Fig. S10** The holes on the nanosheets of MoNi<sub>4</sub>/MoO<sub>3-x</sub>/NiCo@NF

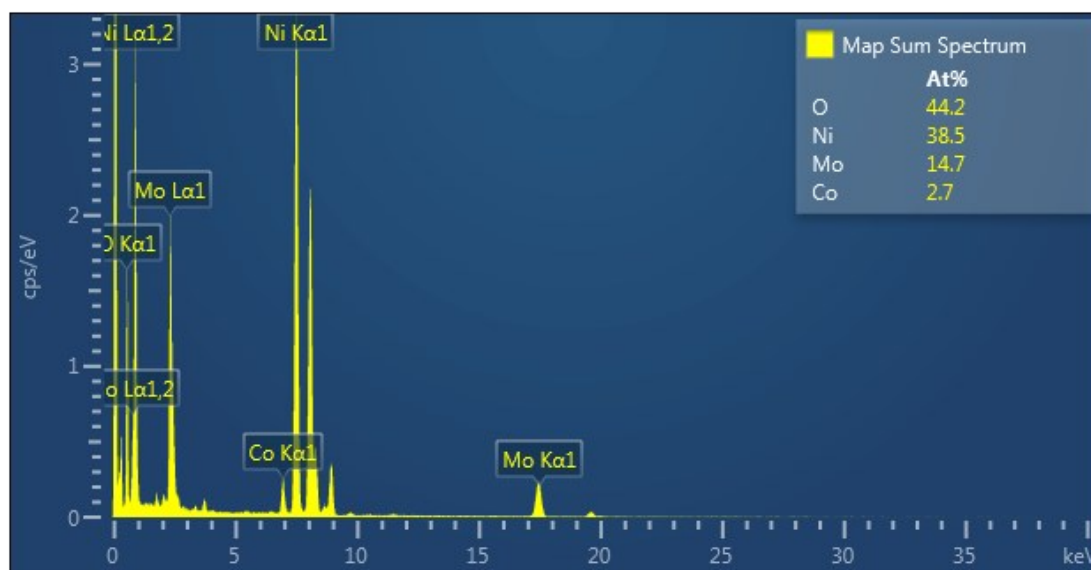

**Fig. S11** EDX analysis of the MoNi<sub>4</sub>/MoO<sub>3-x</sub>/NiCo@NF

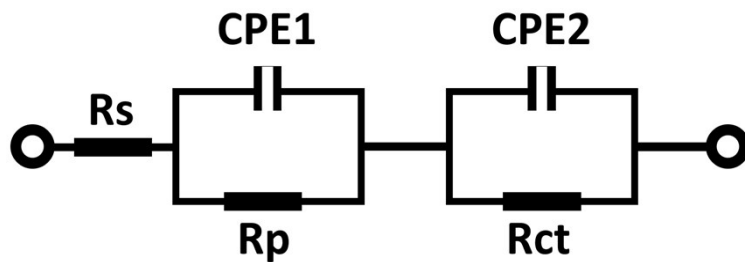

Fig. S12 two-time-constant model equivalent circuit

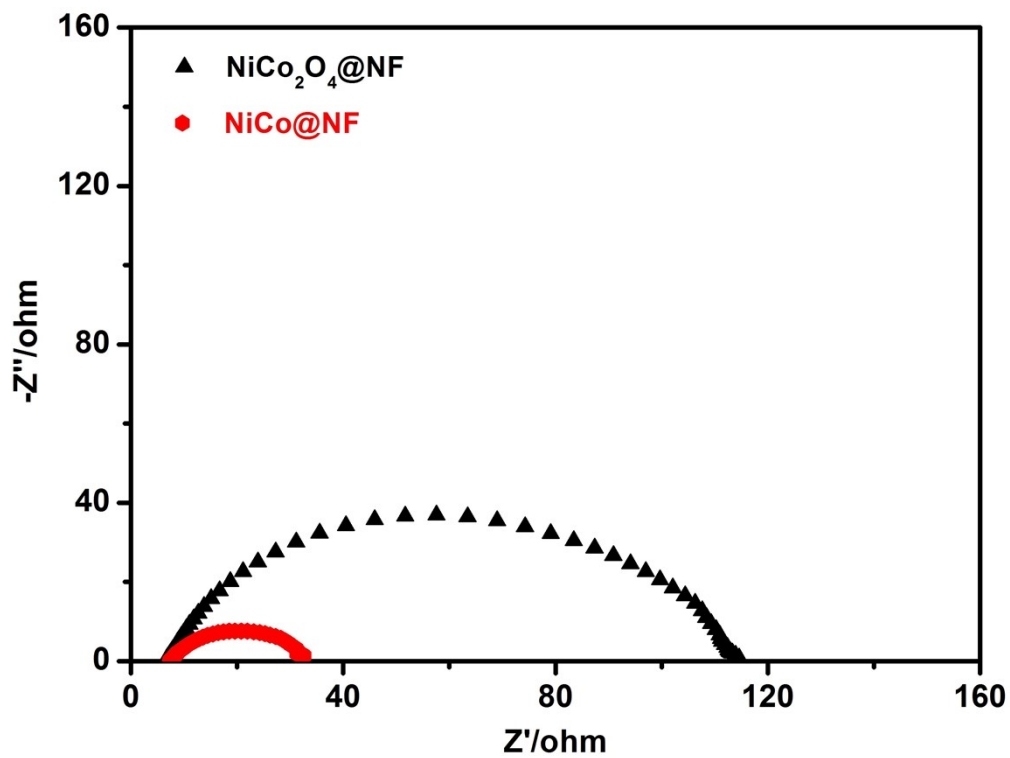

Fig. S13 Electrochemical impedance spectra (EIS) of  $\text{NiCo}_2\text{O}_4@\text{NF}$  and  $\text{NiCo}@\text{NF}$  measured with overpotentials from 200 mV in 1 M KOH.

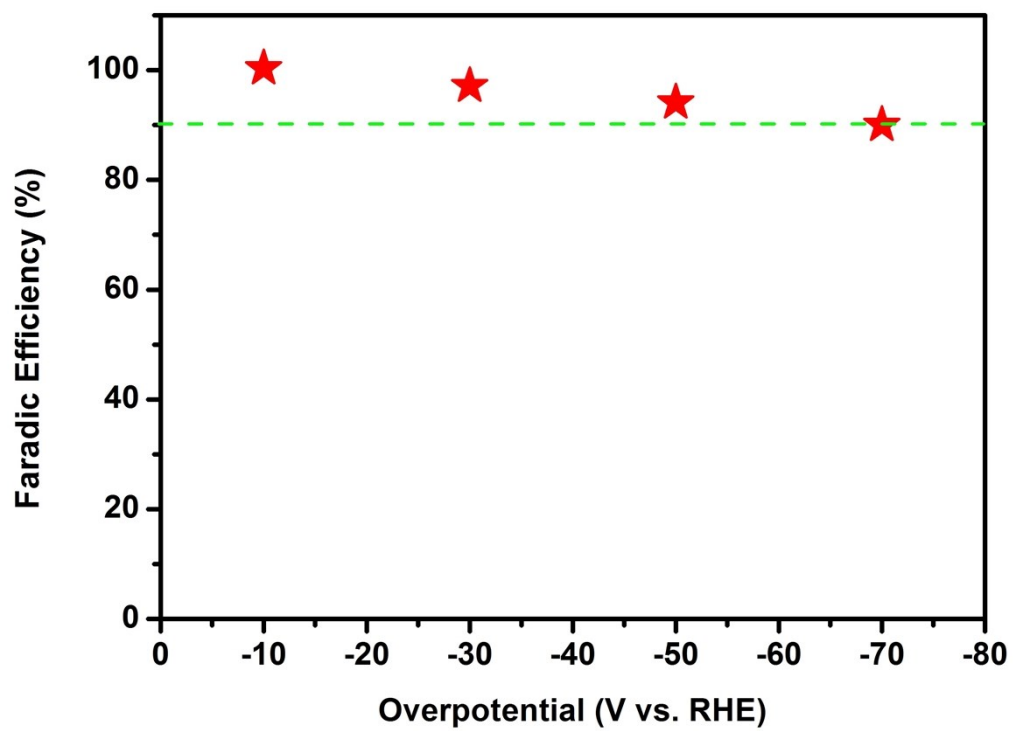

Fig. S14 The Faradaicefficiency of  $\text{MoNi}_4/\text{MoO}_{3-x}/\text{NiCo@NF}$  at different overpotentials in simulated seawater

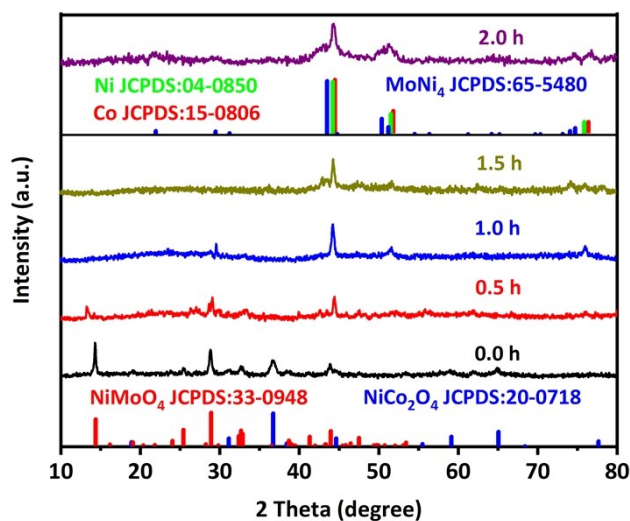

**Fig. S15** XRD of the precursor  $\text{NiCo}_2\text{O}_4/\text{NiMoO}_4@\text{NF}$  calcined at different reduction times

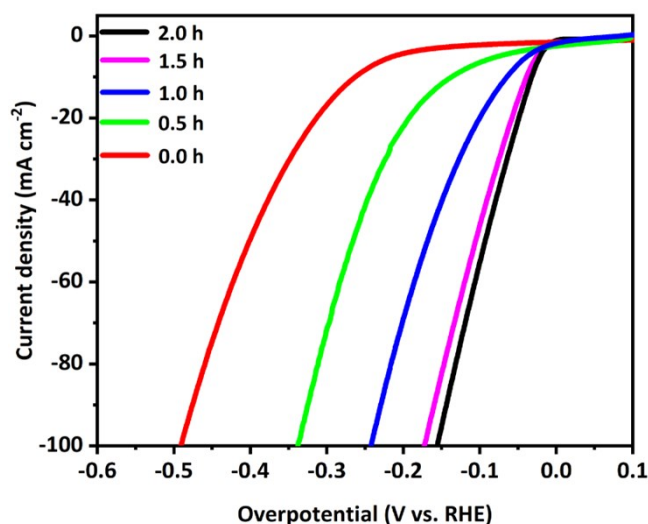

**Fig. S16** LSV curves of precursor  $\text{NiCo}_2\text{O}_4/\text{NiMoO}_4@\text{NF}$  calcined at different reduction time

To study the effect of the reduction time on HER, the samples with different reduction time are prepared. The reduction time was 0, 0.5, 1, 1.5, and 2 h, respectively. The XRD diffraction patterns of these samples shows that with the increase of reduction time, the diffraction peak of metal oxide gradually disappears, and only the diffraction peak of  $\text{MoNi}_4$  can be observed after 2 h of reaction (Fig. R4). The LSV curves of these samples are shown in Fig. R5. To reach current density of  $10 \text{ mA cm}^{-2}$ , the overpotentials required for samples prepared at 0, 0.5, 1, 1.5, and 2 h are 264 mV, 138 mV, 67 mV, 39 mV and 32 mV. It is obviously that the sample prepared at 2 h has the best HER performance.

**Tab. S1** Comparison of the electrocatalytic performance of MoNi<sub>4</sub>/MoO<sub>3-x</sub>/NiCo@NF with the most efficient non-noble metal HER catalysts reported recently in 1 M KOH solution.

| Electrocatalysts                                  | $\eta_{10}$<br>(mV) | Tafel slope<br>(mV/decade) | $C_{dl}$ (mF<br>cm <sup>-2</sup> ) | Reference                                               |
|---------------------------------------------------|---------------------|----------------------------|------------------------------------|---------------------------------------------------------|
| <b>MoNi<sub>4</sub>/MoO<sub>3-x</sub>/NiCo@NF</b> | <b>33</b>           | <b>34</b>                  | <b>405.1</b>                       | <b>This work</b>                                        |
| <b>Fe-CoP HTPAs</b>                               | 98                  | 69                         | 127.9                              | Small 2018, 14,<br>1704233                              |
| <b>Fe-doped Ni<sub>2</sub>P</b>                   | 33                  | 26                         | 297                                | ACS Catal. 2019,<br>9, 8882–8892                        |
| <b>Cu@NiFe LDH</b>                                | 30                  | 34.3                       | 59.8                               | Energy Environ.<br>Sci., 2017, 10,<br>1820              |
| <b>Fe<sub>0.29</sub>C<sub>0.71</sub>P/Ni-foam</b> | 74                  | 53.56                      | 52.5                               | Nano Energy,<br>2020, 67, 104174                        |
| <b>Mo<sub>2</sub>N/CeO<sub>2</sub>@NF</b>         | 26                  | 37.8                       | 80                                 | ACS Appl. Mater.<br>Interfaces 2020, 12,<br>29153–29161 |
| <b>CoWO<sub>4-x</sub>@C</b>                       | 46.8                | 50.1                       | 1.58                               | Appl Catal B-<br>Environ, 2019, 259,<br>118090          |
| <b>CoP@NiFe-OH/SPNF</b>                           | 118 <sup>a</sup>    | 71.7                       | 29.75                              | Nano Energy 2019<br>63 103821                           |
| <b>Ni<sub>3</sub>N-NiMoN</b>                      | 31                  | 46                         | 241                                | Nano Energy,<br>2018, 44, 353–363                       |
| <b>MoNi<sub>4</sub>/MoO<sub>3-x</sub></b>         | 17                  | 36                         | 128                                | Adv. Mater. 2017,<br>29, 1703311                        |
| <b>U-Fe-β-Ni(OH)<sub>2</sub>/NF</b>               | 121                 | 30.1                       | 3.96                               | ACS Appl. Mater.<br>Interfaces 2020, 12,<br>36208–36219 |
| <b>NiCoO<sub>x</sub>/NiCoP</b>                    | 35                  | 56                         | 5.91                               | J Alloy Compd,<br>2020, 835, 155364                     |
| <b>Ni(OH)<sub>2</sub>-NiMoO<sub>x</sub></b>       | 36                  | 38                         | 168.6                              | Adv. Energy Mater.<br>2019, 9, 1902703                  |
| <b>Ni(OH)<sub>2</sub>-NiS<sub>2</sub>/TM</b>      | 90                  | 89                         | -----                              | Inorg. Chem.<br>2017, 22, 13651–<br>13654               |
| <b>Ni/V<sub>2</sub>O<sub>3</sub></b>              | 22 <sup>b</sup>     | -----                      | 133.9                              | Nano Research,<br>2020, 13, 2407–<br>2412               |

a,b: at 20 mA·cm<sup>-2</sup>

**Tab. S2** Comparison of the electrocatalytic performance of MoNi<sub>4</sub>/MoO<sub>3-x</sub>/NiCo@NF with the most efficient HER catalysts reported recently in natural or simulated seawater.

| <b>Electrocatalysts</b>                           | <b>Overpotential (mV) at<br/>10 mA/cm<sup>2</sup></b> | <b>Reference</b>                               |
|---------------------------------------------------|-------------------------------------------------------|------------------------------------------------|
| <b>MoNi<sub>4</sub>/MoO<sub>3-x</sub>/NiCo@NF</b> | <b>101</b>                                            | <b>This work</b>                               |
| <b>Pt@mh-3D MXene</b>                             | 280                                                   | Adv. Funct. Mater. 2020,<br>1910028            |
| <b>Fe-doped Co<sub>2</sub>P</b>                   | 771 <sup>c</sup>                                      | J Energy Chem, 2021, 55,<br>92–101             |
| <b>Pt–Ru–Mo</b>                                   | 196                                                   | J. Mater. Chem. A, 2016,<br>4,6513–6520        |
| <b>Mn–NiO–Ni/Ni-F</b>                             | 170                                                   | Energy Environ. Sci.,<br>2018, 11, 1898        |
| <b>Mo<sub>2</sub>C-MoP NPC/CFP-800</b>            | 346                                                   | ELECTROCHIM ACTA<br>2018, 281, 710-716         |
| <b>NiCoP (PF-NiCoP/NF)</b>                        | 287                                                   | ACS Appl. Energy Mater.,<br>2019, 2, 3910–3917 |

c: at 300 mA·cm<sup>-2</sup>
